# Supplementary material
Source: publisher figshare collection journal article supplement (https://gsapubs.figshare.com/ndownloader/files/23295017)
Supplement: Supplementary file 1 [file 23295017]

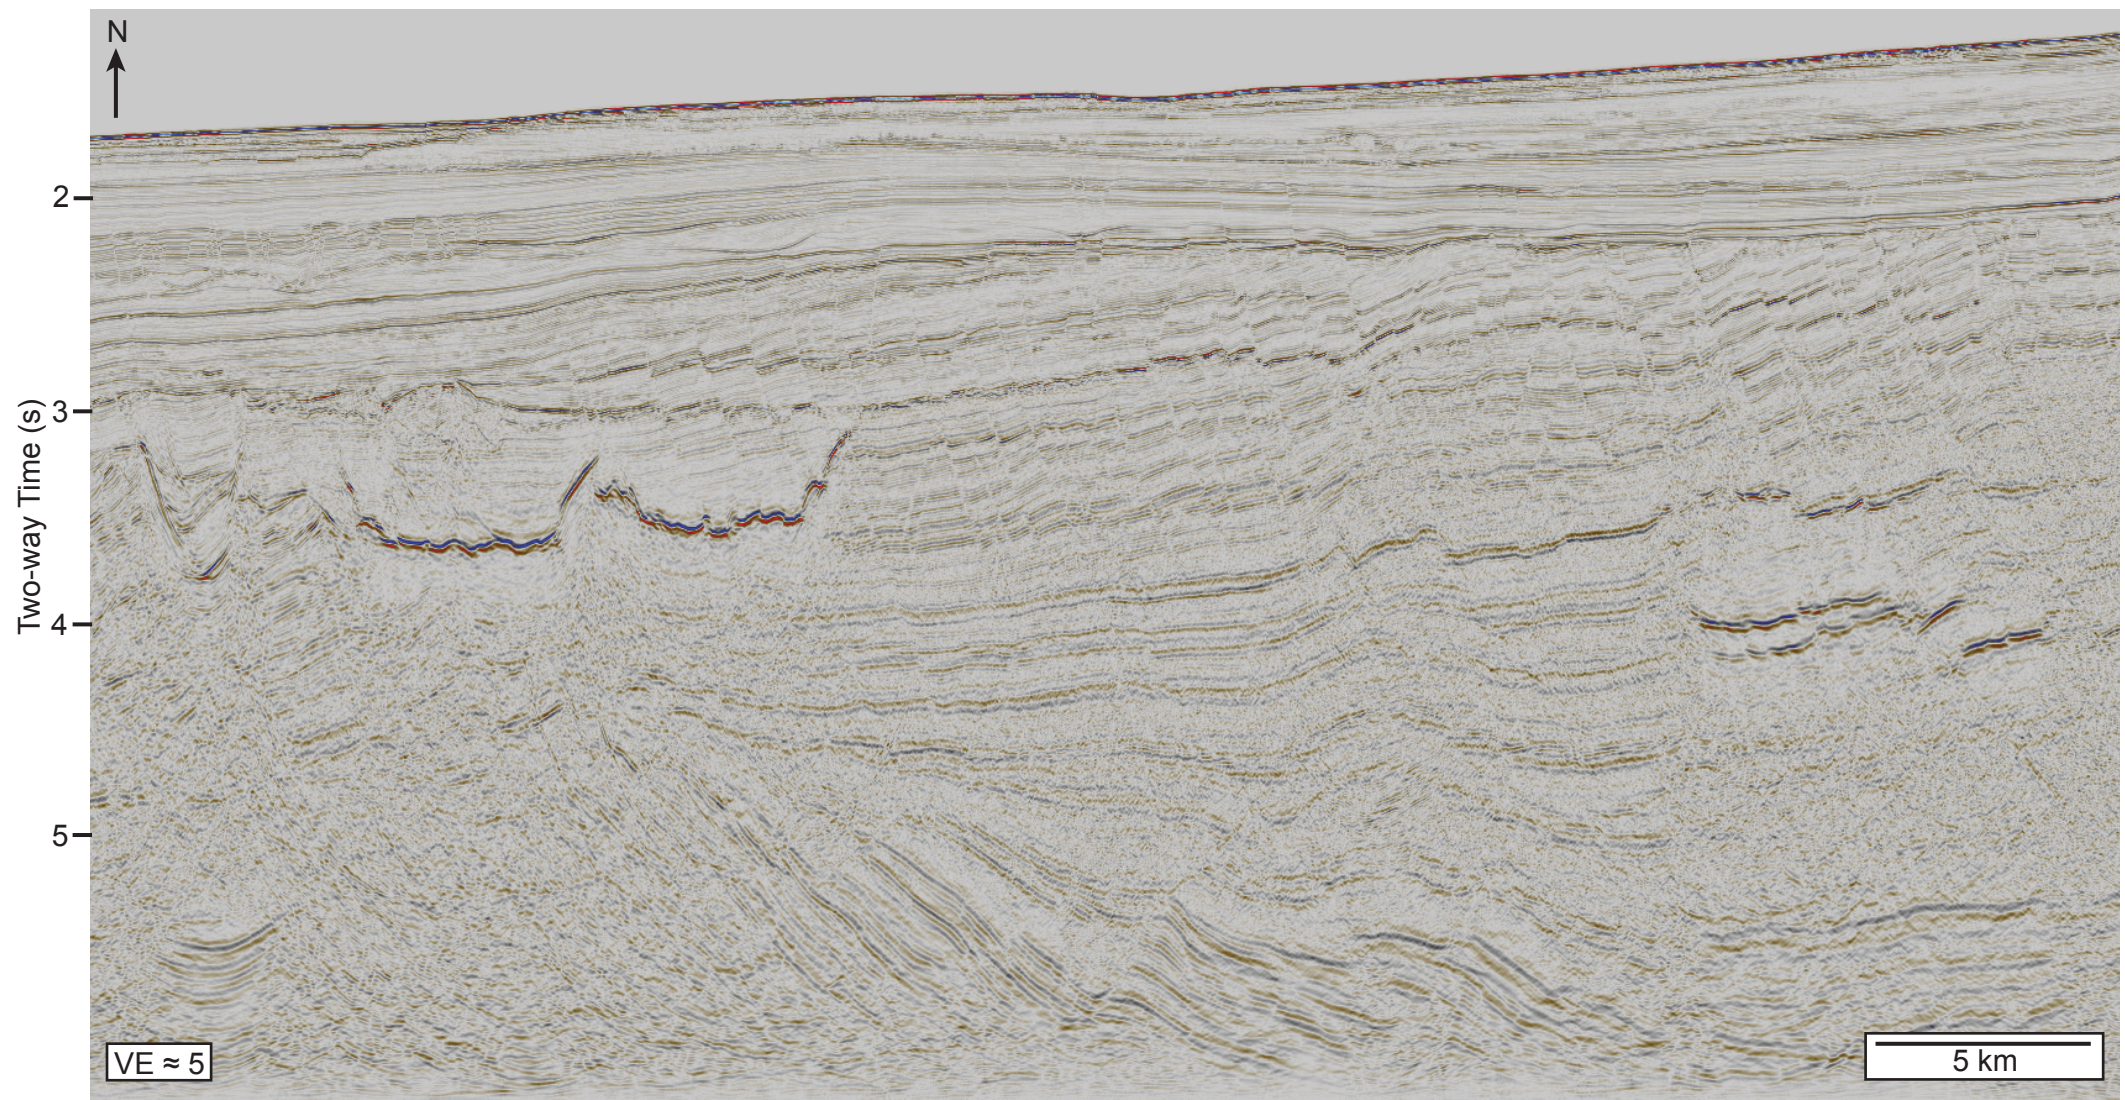

Figure DR1: Uninterpreted seismic section used to construct Fig. 1B.



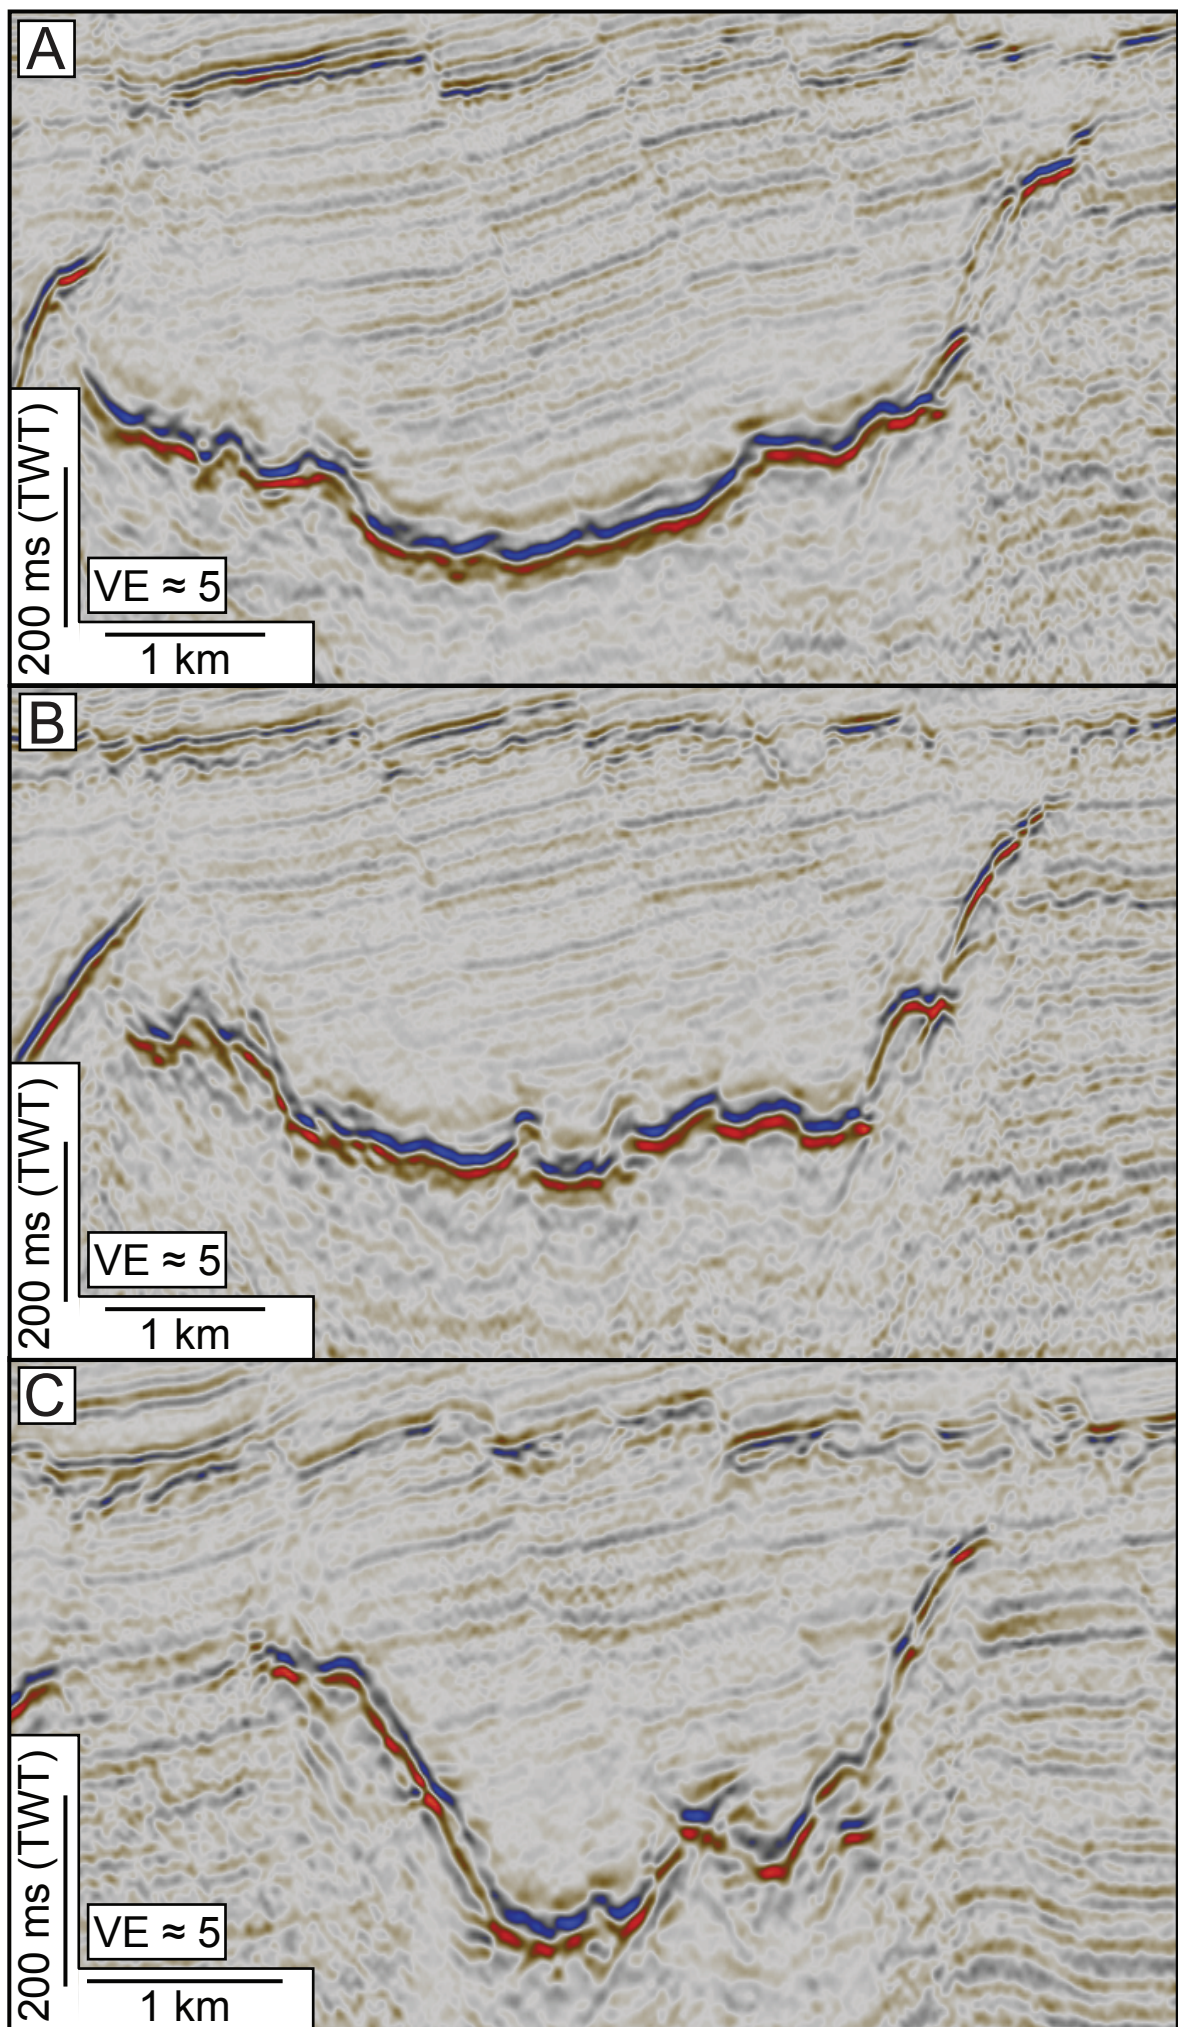

Fig. DR2: Uninterpreted seismic sections from Figure 2.
